# Supplementary material for: Meiofauna at a tropical sandy beach in the SW Atlantic: the influence of seasonality on diversity
Source: PeerJ. 2024 Jul 12;12:e17727. doi: 10.7717/peerj.17727 (PMC11249015; doi:10.7717/peerj.17727)
Supplement: Supplemental Information 1 [file peerj-12-17727-s001.docx]

| Season | Date |
| --- | --- |
| Summer | December 12th, 2019  January 12th, 2020  February 11th, 2020 |
| Autumn | March 11th, 2020  April 7th, 2020  May 26th, 2020 |
| Winter | June 22nd, 2020  July 23rd, 2020  August 22nd, 2020 |
| Spring | September 20th, 2020  October 15th, 2020  November 28th, 2020 |
