# Supplementary material for: Meiofauna at a tropical sandy beach in the SW Atlantic: the influence of seasonality on diversity
Source: PeerJ. 2024 Jul 12;12:e17727. doi: 10.7717/peerj.17727 (PMC11249015; doi:10.7717/peerj.17727)
Supplement: Supplemental Information 6 — Abundance of amplicon sequence variant reads from meiofaunal taxa per season [file peerj-12-17727-s006.xlsx]

## Sheet: Planilha1
Taxa	AUTUMN	AUTUMN	AUTUMN	AUTUMN	AUTUMN	AUTUMN	AUTUMN	AUTUMN	AUTUMN	SPRING	SPRING	SPRING	SPRING	SPRING	SPRING	SPRING	SPRING	SPRING	SUMMER	SUMMER	SUMMER	SUMMER	SUMMER	SUMMER	SUMMER	SUMMER	SUMMER	WINTER	WINTER	WINTER	WINTER	WINTER	WINTER	WINTER	WINTER	WINTER
d__Eukaryota;p__Rotifera;c__Bdelloidea;__;__;__;__	8	0	0	0	0	0	0	0	0	0	0	0	0	0	0	0	0	0	0	0	0	0	0	0	0	0	0	0	0	0	0	0	0	0	0	0
d__Eukaryota;p__Gastrotricha;c__Gastrotricha;o__Macrodasyida;f__Macrodasyida;g__Macrodasyida;s__Tetranchyroderma_sp.	0	0	0	0	0	0	0	0	5	0	0	0	0	0	0	0	0	0	0	0	0	0	0	16	0	0	0	0	0	8	0	24	0	0	0	23
d__Eukaryota;p__Annelida;c__Clitellata;o__Haplotaxida;f__Haplotaxida;g__Haplotaxida;__	0	0	0	0	0	0	0	0	0	0	0	0	0	0	0	0	0	0	21	0	25	0	0	0	0	0	0	0	0	0	0	0	0	0	0	5
d__Eukaryota;p__Annelida;c__Polychaeta;__;__;__;__	0	0	0	0	0	0	0	0	0	0	0	0	0	0	9	0	0	0	75	0	0	0	0	0	0	0	0	0	0	0	0	39	0	0	0	0
d__Eukaryota;p__Arthropoda;c__Maxillopoda;o__Harpacticoida;f__Harpacticoida;g__Harpacticoida;s__Diarthrodes_sp.	0	0	0	0	0	0	0	0	0	6	15	0	0	0	0	0	0	0	0	0	0	0	0	0	0	0	0	0	0	0	0	0	0	0	0	0
d__Eukaryota;p__Arthropoda;c__Maxillopoda;o__Harpacticoida;f__Harpacticoida;g__Harpacticoida;__	0	0	5	0	0	0	112	47	45	7	0	0	0	0	0	8	8	0	0	137	15	0	0	0	89	371	119	229	0	44	53	0	0	31	245	435
d__Eukaryota;p__Echinodermata;c__Ophiuroidea;o__Ophiuroidea;f__Ophiuroidea;g__Ophiuroidea;__	0	12	0	0	0	0	0	0	0	0	0	0	0	0	0	0	0	0	0	0	0	0	0	0	0	0	0	0	0	0	0	0	0	0	0	0
d__Eukaryota;p__Arthropoda;c__Maxillopoda;__;__;__;__	0	18	13	14	8	0	10	0	0	0	0	0	0	22	4	0	0	0	0	62	0	105	80	117	0	24	0	0	0	25	31	36	23	22	247	201
d__Eukaryota;p__Annelida;__;__;__;__;__	49	11	18	10	7	9	11	30	17	17	8	0	19	17	11	6	17	0	16	158	0	0	0	4	0	7	5	0	2	9	0	28	9	0	24	9
d__Eukaryota;p__Cnidaria;c__Anthozoa;o__Zoantharia;f__Zoantharia;g__Zoantharia;s__Palythoa_variabilis	0	0	0	0	0	0	0	0	0	0	2	0	0	0	2	0	0	0	0	0	0	0	0	0	0	0	0	0	0	0	0	0	0	0	0	0
d__Eukaryota;p__Arthropoda;c__Ostracoda;o__Podocopida;f__Podocopida;g__Podocopida;s__Cytheropteron_subuchioi	0	0	0	0	0	3	0	0	0	0	0	0	0	0	0	0	0	0	0	0	0	0	0	0	0	0	0	0	0	0	0	0	0	0	0	0
d__Eukaryota;p__Annelida;c__Polychaeta;o__Aspidosiphonidormes;f__Aspidosiphonidormes;g__Aspidosiphonidormes;__	0	0	0	0	0	0	0	5	0	0	0	0	0	0	0	0	0	0	0	0	0	0	0	0	0	0	0	0	0	0	0	0	0	0	0	0
d__Eukaryota;p__Annelida;c__Polychaeta;o__Phyllodocida;f__Phyllodocida;g__Phyllodocida;__	0	0	0	0	0	0	0	0	0	17	0	0	0	0	0	0	0	0	0	0	9	0	0	0	0	20	0	0	0	0	0	0	0	0	15	0
d__Eukaryota;p__Nematozoa;c__Chromadorea;__;__;__;__	6	0	3	5	23	0	24	7	35	0	0	0	0	8	0	0	0	0	0	0	0	24	17	39	89	71	72	0	9	16	8	20	43	49	58	144
d__Eukaryota;p__Platyhelminthes;c__Rhabditophora;o__Rhabdocoela;f__Kalyptorhynchia;g__Kalyptorhynchia;s__Alcha_evelinae	0	0	0	0	0	0	0	0	0	0	0	0	0	0	0	0	0	0	5	0	0	0	0	0	0	0	0	0	0	0	0	0	0	0	0	0
d__Eukaryota;p__Arthropoda;c__Ostracoda;o__Podocopida;f__Podocopida;g__Podocopida;__	0	852	0	0	0	0	0	0	0	0	0	0	0	0	0	0	0	0	0	4	0	0	0	0	14	31	0	0	0	9	0	31	0	0	47	33
d__Eukaryota;p__Nematozoa;c__Chromadorea;o__Rhabditida;f__Rhabditida;g__Rhabditida;s__Pellioditis_marina	0	0	0	0	0	0	3	0	0	0	0	0	0	0	0	0	0	0	0	0	0	0	0	82	0	0	0	0	205	0	0	0	0	0	0	0
d__Eukaryota;p__Gastrotricha;c__Gastrotricha;o__Macrodasyida;f__Dactylopodolidae;g__Dactylopodolidae;s__Dactylopodola_sp.	0	0	0	0	0	0	0	0	0	0	0	0	0	0	0	0	0	0	0	0	0	0	4	0	3	27	4	0	0	0	0	0	0	0	0	0
d__Eukaryota;p__Mollusca;c__Gastropoda;o__Caenogastropoda;f__Caenogastropoda;g__Caenogastropoda;__	0	13	0	0	0	0	0	0	0	0	0	0	0	0	0	0	0	0	0	0	0	6	10	6	0	5	5	0	0	0	0	0	0	0	0	0
d__Eukaryota;p__Platyhelminthes;c__Rhabditophora;o__Rhabdocoela;f__Kalyptorhynchia;g__Kalyptorhynchia;s__Cheliplana_cf.	0	0	0	0	0	0	0	5	8	0	0	0	17	0	0	0	15	0	0	0	0	25	22	77	16	0	16	0	0	0	0	5	0	0	0	0
d__Eukaryota;p__Platyhelminthes;c__Rhabditophora;o__Rhabdocoela;f__Dalyellioida;g__Dalyellioida;s__Seritia_elegans	0	0	0	0	274	0	0	0	0	0	0	0	0	0	0	0	0	0	0	0	0	0	0	0	0	0	0	0	0	0	0	0	259	0	0	0
d__Eukaryota;p__Annelida;c__Polychaeta;o__Capitellida;f__Capitellida;g__Capitellida;__	0	197	17	0	0	0	0	0	0	0	0	0	0	0	0	0	0	0	0	0	0	0	0	37	0	0	0	0	0	0	9	0	0	0	0	0
d__Eukaryota;p__Mollusca;c__Gastropoda;o__Vetigastropoda;f__Vetigastropoda;g__Vetigastropoda;__	0	0	0	0	0	0	0	0	0	0	0	0	0	0	0	0	0	0	0	0	0	0	0	0	0	4	0	0	0	0	0	0	0	0	0	0
d__Eukaryota;p__Annelida;c__Polychaeta;o__Echiuroinea;f__Echiuroinea;g__Echiuroinea;s__Ochetostoma_erythrogrammon	21	0	7	6	6	7	7	23	5	0	0	0	0	0	0	0	0	0	0	0	0	0	13	21	0	21	15	0	0	0	0	10	0	4	14	6
d__Eukaryota;p__Gastrotricha;c__Gastrotricha;o__Macrodasyida;f__Macrodasyida;g__Macrodasyida;s__Dolichodasys_sp.	0	0	0	0	0	0	0	0	0	0	0	0	0	0	0	0	0	0	0	0	0	0	4	4	0	0	0	0	0	0	0	0	0	0	0	4
d__Eukaryota;p__Arthropoda;c__Ostracoda;o__Podocopida;f__Podocopida;g__Podocopida;s__Xestoleberis_hanaii	0	0	0	0	0	0	0	0	0	0	0	0	0	0	0	0	0	0	0	0	0	0	0	0	0	0	0	45	0	0	0	0	0	0	0	0
d__Eukaryota;p__Echinodermata;c__Holothuroidea;o__Holothuroidea;f__Holothuroidea;g__Holothuroidea;__	2	6	0	0	0	0	0	11	0	0	0	0	0	0	0	0	0	0	0	0	0	0	0	4	7	0	0	0	0	0	0	0	0	0	0	0
d__Eukaryota;p__Nematozoa;c__Chromadorea;o__Chromadorida;f__Chromadorida;g__Chromadorida;s__uncultured_eukaryote	0	0	0	0	0	0	0	0	0	0	0	0	0	0	0	0	0	0	0	18	0	0	0	0	0	0	0	0	0	0	0	0	0	0	0	0
d__Eukaryota;p__Annelida;c__Polychaeta;o__Eunicida;f__Eunicida;g__Eunicida;__	0	8	0	0	9	0	0	23	13	0	0	0	0	0	0	0	0	0	0	0	0	15	0	0	0	19	0	0	0	0	0	0	0	22	38	38
d__Eukaryota;p__Mollusca;c__Gastropoda;o__Vetigastropoda;f__Vetigastropoda;g__Vetigastropoda;s__Fissurella_nodosa	0	0	0	0	0	0	0	0	3	0	0	0	0	0	0	0	0	0	0	0	0	0	0	0	0	0	0	0	0	0	0	0	0	0	0	0
d__Eukaryota;p__Gastrotricha;c__Gastrotricha;o__Macrodasyida;f__Macrodasyida;g__Macrodasyida;__	0	0	0	0	0	0	0	0	0	0	0	0	0	0	0	0	0	0	0	0	0	0	0	0	0	0	0	0	0	0	9	0	0	0	0	0
d__Eukaryota;p__Annelida;c__Polychaeta;o__Phyllodocida;f__Phyllodocida;g__Phyllodocida;s__Perkinsyllis_hartmannschroederae	0	0	0	0	0	0	0	4	0	0	0	0	0	0	0	0	0	0	0	0	0	0	0	0	0	0	0	0	0	0	0	0	0	0	7	0
d__Eukaryota;p__Annelida;c__Polychaeta;o__Echiuroinea;f__Echiuroinea;g__Echiuroinea;s__Thalassema_thalassemum	0	0	0	0	0	0	0	0	0	0	0	0	2	0	0	0	0	0	0	0	0	0	0	0	0	0	0	0	0	0	0	0	0	0	0	0
d__Eukaryota;p__Echinodermata;c__Holothuroidea;o__Holothuroidea;f__Holothuroidea;g__Holothuroidea;s__Holothuria_forskali	0	0	0	0	0	0	0	0	0	0	0	0	0	0	4	0	0	0	0	0	0	0	0	0	0	0	0	0	0	0	0	0	0	0	0	0
d__Eukaryota;p__Annelida;c__Polychaeta;o__Golfingiida;f__Golfingiida;g__Golfingiida;s__Xenosiphon_branchiatus	0	0	0	0	0	0	0	0	0	0	0	0	0	0	0	0	0	0	0	0	0	0	0	0	0	0	0	0	0	0	0	0	0	0	12	0
d__Eukaryota;p__Cnidaria;c__Anthozoa;o__Actiniaria;f__Actiniaria;g__Actiniaria;__	0	0	0	0	0	0	0	0	0	0	0	0	0	0	0	0	0	0	0	35	0	0	0	0	0	0	0	2	0	0	0	0	0	0	5	0
d__Eukaryota;p__Arthropoda;c__Arachnida;o__Acari;f__Acari;g__Acari;s__Metaseiulus_occidentalis	0	0	0	0	0	0	0	0	0	0	0	0	0	0	0	0	0	0	0	0	0	0	0	0	0	3	0	0	0	0	0	0	0	0	0	0
d__Eukaryota;p__Nematozoa;c__Chromadorea;o__Monhysterida;f__Monhysterida;g__Monhysterida;s__Metadesmolaimus_sp.	0	0	0	0	0	0	0	0	0	0	0	0	0	0	0	0	0	0	0	0	0	0	26	27	0	0	0	0	0	0	0	0	0	0	0	0
d__Eukaryota;p__Nematozoa;c__Chromadorea;o__Desmodorida;f__Desmodorida;g__Desmodorida;s__Laxus_cosmopolitus	0	0	0	0	0	0	0	0	0	0	0	0	0	0	0	0	0	0	0	0	5	0	0	0	0	0	0	0	0	0	0	0	0	0	0	0
d__Eukaryota;p__Nemertea;c__Enopla;o__Monostilifera;f__Monostilifera;g__Monostilifera;s__Oerstedia_dorsalis	0	0	0	0	0	0	0	0	0	0	0	0	0	0	0	0	0	0	0	0	0	0	0	0	0	0	0	0	0	7	0	0	0	0	0	0
d__Eukaryota;p__Annelida;c__Polychaeta;o__Protodrilidae;f__Protodrilidae;g__Protodrilus;__	0	0	0	0	0	0	0	0	0	0	5	0	0	0	0	0	0	0	0	0	0	0	0	0	0	0	0	0	0	0	0	0	0	0	0	0
d__Eukaryota;p__Nemertea;c__Anopla;o__Palaeonemertea;f__Palaeonemertea;g__Palaeonemertea;s__Cephalothrix_hongkongiensis	0	0	0	0	0	0	0	0	0	0	0	0	0	12	8	0	0	0	0	0	0	0	0	0	0	0	0	0	0	0	0	0	0	0	0	0
d__Eukaryota;p__Arthropoda;c__Ostracoda;o__Podocopida;f__Podocopida;g__Podocopida;s__Kotoracythere_inconspicua	0	0	0	0	0	0	0	0	0	0	224	0	2	0	0	0	0	0	0	7	0	0	0	0	0	0	0	0	0	0	0	0	0	0	0	0
d__Eukaryota;p__Platyhelminthes;__;__;__;__;__	0	0	0	0	0	0	0	2	12	0	0	0	0	0	0	0	0	0	0	0	0	0	0	0	0	0	0	0	0	0	0	0	0	0	0	0
d__Eukaryota;p__Platyhelminthes;c__Rhabditophora;o__Rhabdocoela;f__Kalyptorhynchia;g__Kalyptorhynchia;__	0	0	0	0	22	0	0	0	0	0	0	0	0	0	0	0	0	0	0	0	0	0	0	0	0	0	0	0	0	0	0	0	4	0	0	0
d__Eukaryota;p__Gastrotricha;c__Gastrotricha;o__Chaetonotida;f__Chaetonotida;g__Chaetonotida;__	0	0	0	0	0	0	0	0	0	0	0	0	0	0	0	0	0	0	0	0	0	0	0	0	0	0	0	0	0	0	0	0	0	0	0	40
d__Eukaryota;p__Platyhelminthes;c__Rhabditophora;o__Rhabdocoela;f__Neodalyellida;g__Neodalyellida;s__Kymocarens_sp.	0	0	0	0	0	0	0	6	0	0	0	0	0	0	0	0	0	0	0	0	0	0	0	0	0	0	0	0	0	0	0	0	0	0	0	0
d__Eukaryota;p__Arthropoda;c__Arachnida;o__Acari;f__Acari;g__Acari;__	0	0	0	0	0	0	0	0	0	0	2	0	10	0	17	0	0	0	0	0	0	0	0	0	0	0	0	0	0	0	0	0	0	0	0	0
d__Eukaryota;p__Annelida;c__Polychaeta;o__Sabellida;f__Sabellida;g__Sabellida;__	0	6	0	0	0	0	0	0	0	0	0	0	0	0	0	0	0	0	0	0	0	0	0	0	0	0	0	0	0	0	3	0	0	0	0	0
d__Eukaryota;p__Arthropoda;c__Malacostraca;o__Eucarida;f__Eucarida;g__Eucarida;__	0	0	2	0	0	0	0	0	0	0	0	0	0	0	0	0	4	0	0	0	0	0	0	0	0	0	0	0	0	0	0	0	0	0	0	0
d__Eukaryota;p__Nematozoa;c__Chromadorea;o__Monhysterida;f__Monhysterida;g__Monhysterida;s__Daptonema_procerus	0	0	0	0	0	0	0	0	0	0	0	0	0	0	0	0	0	0	0	0	0	0	0	0	3	0	0	0	0	0	0	0	0	0	0	0
d__Eukaryota;p__Mollusca;c__Bivalvia;o__Pterioida;f__Pterioida;g__Pterioida;s__Isognomon_californicum	0	0	0	4	0	0	0	9	0	0	0	0	2	5	0	0	4	0	0	0	0	0	0	2	0	0	0	0	0	0	0	7	0	5	6	6
d__Eukaryota;p__Annelida;c__Polychaeta;o__Terebellida;f__Terebellida;g__Terebellida;s__Acrocirrus_validus	0	0	0	0	0	0	0	0	0	12	8	0	0	0	0	0	0	0	0	0	0	0	0	0	0	0	0	0	0	0	0	0	0	0	0	0
d__Eukaryota;p__Nematozoa;c__Enoplea;o__Enoplida;f__Enoplida;g__Enoplida;s__Bathylaimus_assimilis	0	0	0	0	0	0	0	0	9	0	0	0	0	0	0	0	0	0	0	0	0	0	0	0	0	0	0	0	0	0	0	0	0	0	0	0
d__Eukaryota;p__Arthropoda;c__Arachnida;o__Acari;f__Acari;g__Acari;s__Quercus_lobata	0	0	0	0	0	0	0	0	0	0	0	0	5	0	0	0	0	0	0	0	0	0	0	0	0	0	0	0	0	0	0	0	0	0	0	0
d__Eukaryota;p__Platyhelminthes;c__Rhabditophora;o__Rhabdocoela;f__Neodalyellida;g__Neodalyellida;s__Byrsophlebidae_sp.	0	2	0	0	0	0	0	0	0	0	0	0	0	0	0	0	0	0	0	0	0	0	0	0	0	0	0	0	0	0	0	0	0	0	0	0
d__Eukaryota;p__Annelida;c__Polychaeta;o__Capitellida;f__Capitellida;g__Capitellida;s__Dasybranchus_caducus	0	0	0	0	0	0	0	0	0	0	0	0	0	0	0	0	0	0	0	0	0	8	0	13	0	0	0	10	0	0	0	0	0	14	6	0
d__Eukaryota;p__Mollusca;c__Bivalvia;o__Ostreoida;f__Ostreoida;g__Ostreoida;s__Ostrea_edulis	0	0	0	0	4	0	0	0	0	0	0	0	0	0	0	0	0	0	0	0	0	0	0	0	0	0	0	0	0	0	0	0	0	0	0	0
d__Eukaryota;p__Platyhelminthes;c__Rhabditophora;o__Rhabdocoela;f__Neodalyellida;g__Neodalyellida;__	0	0	0	0	0	0	0	0	0	0	0	0	0	0	0	0	0	0	0	0	0	0	0	0	23	0	0	0	0	0	0	0	0	0	0	0
d__Eukaryota;p__Annelida;c__Polychaeta;o__Capitellida;f__Capitellida;g__Capitellida;s__Notomastus_tenuis	158	0	210	0	0	0	0	0	0	0	0	0	0	0	0	0	0	0	76	612	95	0	0	0	17	21	16	0	0	0	0	0	0	0	0	14
d__Eukaryota;p__Arthropoda;c__Maxillopoda;o__Calanoida;f__Calanoida;g__Calanoida;__	0	0	0	0	0	0	0	0	0	0	0	0	0	0	0	0	0	0	0	0	0	0	0	0	0	0	0	0	0	0	0	0	3	0	0	0
d__Eukaryota;p__Echinodermata;c__Holothuroidea;o__Holothuroidea;f__Holothuroidea;g__Holothuroidea;s__Euapta_tahitiensis	0	61	0	0	0	0	0	0	0	0	0	0	0	0	0	0	0	0	0	0	0	0	0	0	0	0	0	0	0	0	0	0	0	0	0	0
d__Eukaryota;p__Nemertea;c__Enopla;o__Monostilifera;f__Monostilifera;g__Monostilifera;__	0	0	0	0	0	0	0	0	0	0	0	0	0	0	0	0	0	0	0	0	0	0	0	0	0	9	0	19	0	0	8	0	0	0	0	0
d__Eukaryota;p__Mollusca;c__Bivalvia;o__Mytiloida;f__Mytiloida;g__Mytiloida;__	0	0	0	0	0	0	0	0	0	0	0	0	0	0	0	0	0	0	0	0	0	0	0	0	0	0	4	0	0	0	0	0	0	0	0	0
d__Eukaryota;p__Annelida;c__Polychaeta;o__Spionida;f__Spionida;g__Spionida;__	0	0	0	0	0	0	0	0	0	0	4	0	0	0	0	0	0	0	0	0	0	0	0	0	0	0	0	0	0	0	0	0	0	0	0	0
d__Eukaryota;p__Mollusca;c__Bivalvia;o__Mytiloida;f__Mytiloida;g__Mytiloida;s__Geukensia_demissa	0	0	5	0	0	0	0	0	0	0	0	0	0	0	0	0	0	0	0	0	0	0	0	0	0	0	0	0	3	0	6	0	0	0	0	0
d__Eukaryota;p__Nematozoa;c__Chromadorea;o__Chromadorida;f__Chromadorida;g__Chromadorida;s__Chromadorita_leuckarti	0	0	0	0	0	0	0	8	0	0	0	0	0	0	0	0	0	0	0	0	0	0	0	0	0	0	0	0	0	0	0	0	0	0	0	0
d__Eukaryota;p__Mollusca;c__Gastropoda;o__Heterobranchia;f__Heterobranchia;g__Heterobranchia;__	0	0	0	0	0	0	0	0	0	0	0	0	0	0	0	0	0	0	0	0	0	0	0	3	0	0	0	0	0	0	0	0	0	0	0	0
d__Eukaryota;p__Annelida;c__Polychaeta;o__Terebellida;f__Terebellida;g__Terebellida;s__Pectinaria_gouldii	0	0	0	0	0	0	0	0	0	0	0	0	0	0	0	0	0	0	0	0	0	0	0	0	0	0	0	0	0	0	0	0	0	0	0	3
d__Eukaryota;p__Echinodermata;c__Echinoidea;o__Echinoidea;f__Echinoidea;g__Echinoidea;__	0	0	0	0	0	0	0	0	0	0	0	0	0	0	0	0	0	0	0	0	0	0	0	0	0	5	0	0	0	0	0	0	0	0	9	9
d__Eukaryota;p__Platyhelminthes;c__Rhabditophora;o__Rhabdocoela;f__Neodalyellida;g__Neodalyellida;s__Promesostoma_sp.	0	0	0	0	0	0	0	0	0	0	0	0	0	0	0	0	0	0	0	6	0	0	0	0	0	0	0	0	0	0	0	0	0	0	0	0
