# Supplementary material for: Meiofauna at a tropical sandy beach in the SW Atlantic: the influence of seasonality on diversity
Source: PeerJ. 2024 Jul 12;12:e17727. doi: 10.7717/peerj.17727 (PMC11249015; doi:10.7717/peerj.17727)
Supplement: Supplemental Information 7 [file peerj-12-17727-s007.xlsx]

## Sheet: Planilha1
Variable	Summer	Summer	Summer	Autumn	Autumn	Autumn	Winter	Winter	Winter	Spring	Spring	Spring
Rainfall	148.7	245.2	185.1	69.2	36	180.6	131.1	59.1	50.3	150.1	250.3	86.5
TOM	4.29509	11.5727	9.92322	7.55298	10.1776	5.07812	5.16117	11.7964	5.80475	3.70004	8.52959	19.059
Carbonate	0.24776	0.575338	0.464092	0.205165	0.400934	0.185359	0.371739	0.455666	0.560889	0.411147	0.636874	0.592593
CHO	844.645	1253.61	893.011	1701.2	2306.58	1095.81	2938.57	724.298	767.81	445.496	2884.94	2975.63
PRT	55.4436	68.7175	20.3759	80.6527	79.7513	81.372	100.92	111.742	78.1819	39.5266	73.8639	89.6533
LIP	432.691	540.487	361.488	381.944	660.122	514.335	450.354	261.756	376.373	58.0399	19.4389	21.5809
PRT_CHO	0.0656413	0.0548157	0.0228171	0.0544163	0.0345755	0.0742571	0.0343431	0.154276	0.101825	0.0887251	0.0256032	0.0301292
CHO_LIP	1.95207	2.31941	2.47038	2.81236	3.49418	2.13055	6.52502	2.76708	2.04002	7.67569	148.411	137.882
BPC	689.544	940.481	638.305	1006.46	1456.8	863.949	1562.64	540.79	627.713	241.096	1204.75	1250.37
